# Supplementary material for: Characterization of spike glycoprotein of SARS-CoV-2 on virus entry and its immune cross-reactivity with SARS-CoV
Source: Springer Nature journal article supplement (doi:10.1038/s41467-020-15562-9), 2020-03-27
Supplement: 41467_2020_15562_MOESM1_ESM.pdf [file 41467_2020_15562_MOESM1_ESM.pdf]

## **Supplementary information**

**Characterization of spike glycoprotein of SARS-CoV-2 on virus entry  
and its immune cross-reactivity with SARS-CoV**

***Ou et al.***

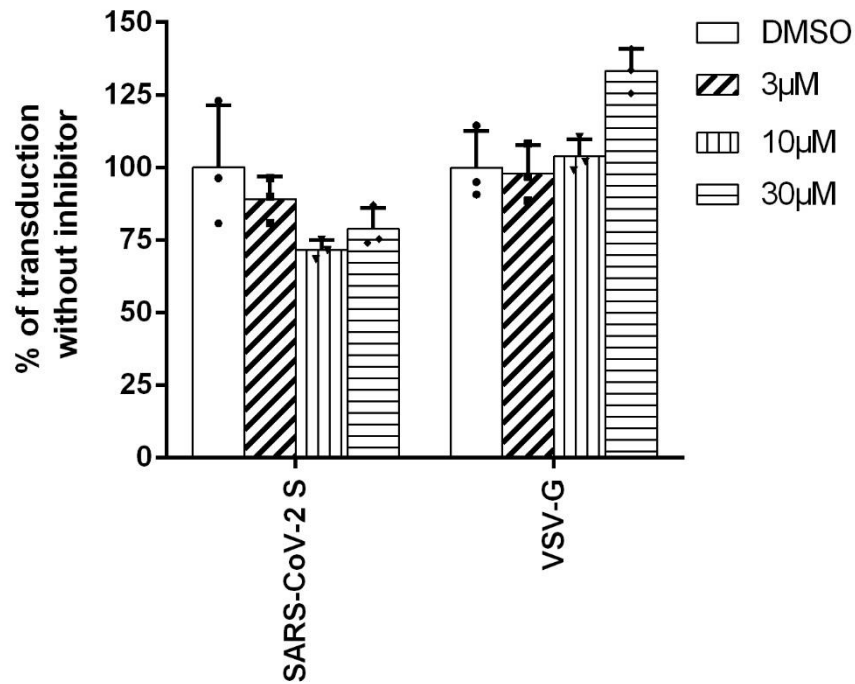

**Supplementary Figure 1. Effect of entry of SARS-CoV-2 S pseudovirions on 293/hACE2 by TRPML1 inhibitor.**

HEK 293/ACE2 cells were transduced with either SARS-CoV-2 S pseudovirions or VSV-G pseudovirions in the presence of 3, 10, 30µM 130. The luciferase activity were measured at 40 hrs post inoculation. The experiments were done triplicate and repeated three times.

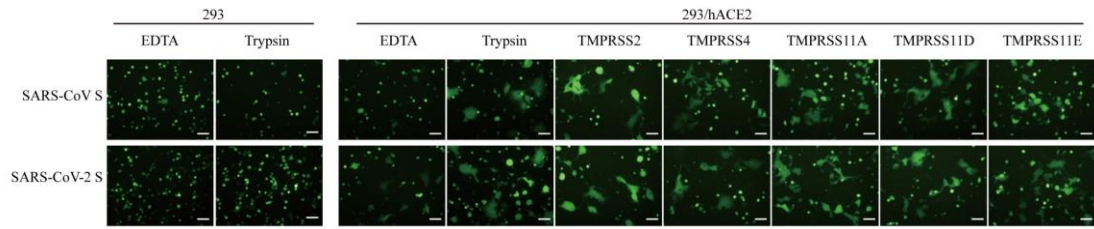

**Supplementary Figure 2. Effect of type II membrane serine proteases (TMPRSS) on SARS-CoV-2 S protein mediated cell-cell fusion.**

HEK-293T cells transiently expressing CoV S glycoprotein and eGFP were lifted with either trypsin (0.25%) or 1mM EDTA, then overlaid on 293/hACE2 cells transiently expressing type II membrane serine protease (TMPRSS) 2, 4, 11A, 11D, or 11E. After 4 hrs incubation, images of syncytia were captured.

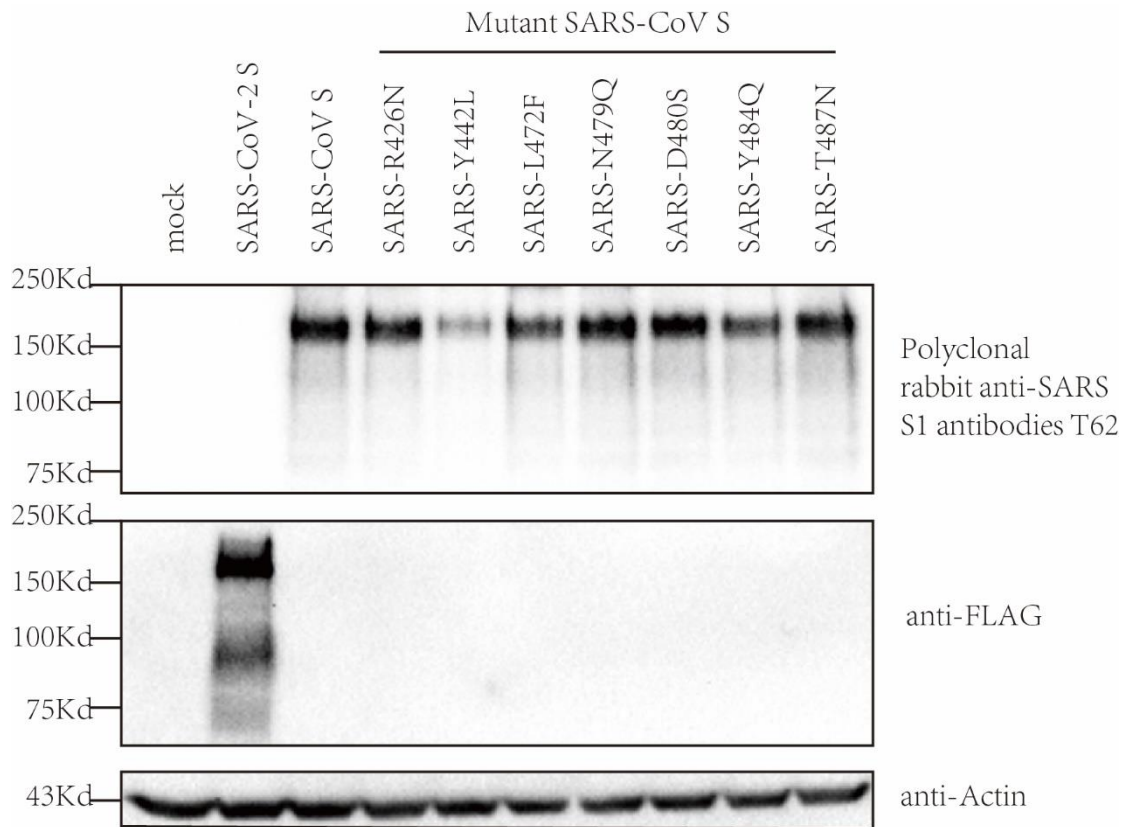

**Supplementary Figure 3. Western blot analysis of expression of SARS-CoV mutant S proteins.**

Top panel: polyclonal rabbit anti-SARS S1 antibodies T62; middle panel: anti-FLAG  
bottom panel: anti-actin.

Supplementary Table 1. Primers used in this study.

| Constructs used in mutagenesis study | Forward primer sequence (5'-3')                    | Reverse primer sequence (5'-3')              |
|--------------------------------------|----------------------------------------------------|----------------------------------------------|
| SARS-CoV-2 S                         | CCGAAGCTTCACCATGTTC<br>GTTTCCTTGTTTC               | CCGGGATCCGCAACATGATCCGCAA<br>GAGCAGC         |
| SARS-CoV S-<br>R426N                 | GTGCTGGCTTGGAACACTA<br>ACAACATTGATGCTACCTC         | GAGGTAGCATCAATGTTGTTAGTGT<br>TCCAAGCCAGCAC   |
| SARS-CoV S-<br>Y442L                 | CTACAACACTACAAGTATCGT<br>CTGCTGCGTCATGGTAAGC<br>TG | CAGCTTACCATGACGCAGCAGACG<br>ATACTTGTAGTTGTAG |
| SARS-CoV S-<br>L472F                 | CTTGCACTCCTCCAGCTTT<br>CAACTGCTACTGGCCTC           | GAGGCCAGTAGCAGTTGAAAGCTG<br>GAGGAGTGCAAG     |
| SARS-CoV S-<br>N479Q                 | CTGCTACTGGCCTCTGCAG<br>GATTACGGTTTCTACAC           | GTGTAGAAACCGTAATCCTGCAGA<br>GGCCAGTAGCAG     |
| SARS-CoV S-<br>D480S                 | CTACTGGCCTCTGAACTCT<br>TACGGTTTCTACACC             | GGTGTAGAAACCGTAAGAGTTCAG<br>AGGCCAGTAG       |
| SARS-CoV S-<br>Y484Q                 | GAACGATTACGGTTTCCAG<br>ACCACTACCGGCATTGG           | CCAATGCCGGTAGTGGTCTGGAAA<br>CCGTAATCGTTC     |
| SARS-CoV S-<br>T487N                 | GTTTCTACACCACTAACGG<br>CATTGGCTACC                 | GGTAGCCAATGCCGTTAGTGGTGTA<br>GAAAC           |

Supplementary Table 2. Codon-optimized DNA sequences of spike gene.

|              |                                                                                                                                                                                                                                                                                                                                                                                                                                                                                                                                                                                                                                                                                                                                                                                                                                                                                                                                                                                                                                                                                                                                                                                                                                                                                                                                                                                                                                                                                                                                                                                                                                                                                                                                                                                                                                                                                                                                                                                                                                                                                                                                                                                                                                                                                                                                                                                                                                                                                                |
|--------------|------------------------------------------------------------------------------------------------------------------------------------------------------------------------------------------------------------------------------------------------------------------------------------------------------------------------------------------------------------------------------------------------------------------------------------------------------------------------------------------------------------------------------------------------------------------------------------------------------------------------------------------------------------------------------------------------------------------------------------------------------------------------------------------------------------------------------------------------------------------------------------------------------------------------------------------------------------------------------------------------------------------------------------------------------------------------------------------------------------------------------------------------------------------------------------------------------------------------------------------------------------------------------------------------------------------------------------------------------------------------------------------------------------------------------------------------------------------------------------------------------------------------------------------------------------------------------------------------------------------------------------------------------------------------------------------------------------------------------------------------------------------------------------------------------------------------------------------------------------------------------------------------------------------------------------------------------------------------------------------------------------------------------------------------------------------------------------------------------------------------------------------------------------------------------------------------------------------------------------------------------------------------------------------------------------------------------------------------------------------------------------------------------------------------------------------------------------------------------------------------|
| SARS-CoV-2 S | <p> ATGTTTCGTTTTCTTGTCTGTTGCCTCTCGTTAGTAGCCAATGCGTCAAC<br/> CTTACTACTAGAACCCAGCTCCCTCCAGCATATACCAACTCTTTCACCAGG<br/> GGCGTATATTACCCGGACAAAGTGTTCGCTCAAGTGTGCTGCATTCTAC<br/> GCAGGACCTTTTCTTGCCCTTTTTTCAGTAATGTTACTTGGTTTCATGCTATC<br/> CATGTGTCTGGAACCTAACGGAACCAAGCGCTTTGACAACCCCGTCCTCC<br/> CTTTCAACGATGGCGTGTACTTCGCTTCCACGGAAAAGTCAAACATAATT<br/> CGCGGCTGGATCTTTGGTACAACACTCGACTCAAAGACGCAGAGCCTGC<br/> TGATCGTTAATAACGCTACAAATGTTGTGATAAAGGTGTGTGAATTTAGT<br/> TCTGCAATGATCCCTTCCTGGGTGTGTACTACCATAAGAATAACAAGAGC<br/> TGGATGGAATCCGAATTTAGGGTTACAGTTCCGCTAACAACCTGCACATT<br/> CGAATACGTAAGCCAGCCATTTCTTATGGATCTTGAGGGCAAGCAAGGAA<br/> ACTTCAAGAACTTGAGGGAGTTCGTGTTCAAAAATATCGACGGCTATTTT<br/> AAGATATATAGCAAGCACACTCCAATAAACTTGGTGCGCGACCTGCCCA<br/> GGGATTCTCTGCTCTGGAGCCCCTGGTGGATCTGCCATTGGAATAACA<br/> TAACTCGCTTTCAAACACTGCTCGCCCTGCATCGCAGTTACCTACCCCT<br/> GGTGATAGTAGTTCAGGATGGACAGCAGGAGCCGCCGATACTACGTCG<br/> GCTACCTGCAGCCTAGGACCTTCTTGCTGAAGTACAACGAGAACGGTAC<br/> AATAACTGACGCTGTGGACTGCGCTCTGGACCCTCTGTCCGAGACGAAG<br/> TGCACCCTGAAGAGCTTTACTGTTGAAAAAGGCATTTACCAAACCAGCA<br/> ACTTCCGCGTCCAGCCAACCGAGAGCATCGTCAGATTTCCCAACATTACA<br/> AATCTGTGTCCCTTCGGCGAGGTGTTCAACGCCACACGCTTCGCTTCAGT<br/> GTACGCATGGAACCGCAAGCGCATATCTAACTGCGTTCGCGGATTATTCTG<br/> TCCTCTACAACCTCCGCTCTTTCTCCACCTTCAAGTGCTACGGAGTGCA<br/> CCGACTAAGCTGAACGATCTCTGCTTTACCAACGTCTACGCGGACTCCTT<br/> CGTGATAAGAGGTGATGAAGTGAGACAAATAGCCCCAGGTCAGACTGGT<br/> AAGATCGCAGATTACAACCTACAAATTGCCTGATGATTTCACTGGTTGCGT<br/> TATCGCGTGGAACCTCTAATAACCTCGATTCTAAGGTCGGTGGTAACTACA<br/> ATTACCTGTACCGCTTGTTTAGGAAGTCAAACCTGAAGCCTTTCGAGAGG<br/> GATATTTCAACCGAAATCTATCAAGCGGGTTCAACACCGTGTAACGGTGT<br/> GGAAGGATTTAACTGCTACTTCCCCCTGCAGTCTTACGGATTCCAGCCAA<br/> CCAATGGCGTGGGTACCAACCTTATCGCGTGGTGGTTCTGAGTTTCGAA<br/> CTGTTGCACGCTCCCGCCACGGTATGCGGTCCCAAGAAGAGCACTAACT<br/> TGGTGAAGAATAAGTGCGTGAATTTCAATTTCAATGGCCTCACTGGAAC<br/> GGAGTGCTGACCGAATCCAATAAGAAGTTCTTGCCCTTCCAGCAGTTTCGG<br/> AAGAGACATTGCTGACACAACCGACGCGGTGCGCGATCCTCAGACTCTG<br/> GAGATATTGGACATTACCATGTTCTTTCGGCGGTGTGTCTGTCATTACT<br/> CCGGGCACGAATACTAGCAACCAGGTAGCCGTGCTGTACCAAGACGTGA<br/> ATTGCACAGAGGTTCCCGTCGCAATTCACGCTGACCAGCTGACCCCCAC<br/> GTGGAGGGTTTACAGCACTGGTAGTAACGTCTTCCAGACGAGAGCCGGT<br/> TGCTTGATCGGAGCGGAACATGTGAATAACTCCTACGAGTGCGACATCCC<br/> CATCGGAGCCGGTATATGCGCCTCTTATCAGACACAACTAACTACCCCA<br/> GGAGAGCCCGCAGTGTGGCTTCTCAAAGCATTATAGCATACACTATGTCT<br/> CTTGGTGCCGAAAATTCCGTGGCCTATTCTAACAATTCAATCGCCATCCCA </p> |
|--------------|------------------------------------------------------------------------------------------------------------------------------------------------------------------------------------------------------------------------------------------------------------------------------------------------------------------------------------------------------------------------------------------------------------------------------------------------------------------------------------------------------------------------------------------------------------------------------------------------------------------------------------------------------------------------------------------------------------------------------------------------------------------------------------------------------------------------------------------------------------------------------------------------------------------------------------------------------------------------------------------------------------------------------------------------------------------------------------------------------------------------------------------------------------------------------------------------------------------------------------------------------------------------------------------------------------------------------------------------------------------------------------------------------------------------------------------------------------------------------------------------------------------------------------------------------------------------------------------------------------------------------------------------------------------------------------------------------------------------------------------------------------------------------------------------------------------------------------------------------------------------------------------------------------------------------------------------------------------------------------------------------------------------------------------------------------------------------------------------------------------------------------------------------------------------------------------------------------------------------------------------------------------------------------------------------------------------------------------------------------------------------------------------------------------------------------------------------------------------------------------------|

|            |                                                                                                                                                                                                                                                                                                                                                                                                                                                                                                                                                                                                                                                                                                                                                                                                                                                                                                                                                                                                                                                                                                                                                                                                                                                                                                                                                                                                                                                                                                                                                                                                                                                                                                                                                                                                                                                                                                                                                   |
|------------|---------------------------------------------------------------------------------------------------------------------------------------------------------------------------------------------------------------------------------------------------------------------------------------------------------------------------------------------------------------------------------------------------------------------------------------------------------------------------------------------------------------------------------------------------------------------------------------------------------------------------------------------------------------------------------------------------------------------------------------------------------------------------------------------------------------------------------------------------------------------------------------------------------------------------------------------------------------------------------------------------------------------------------------------------------------------------------------------------------------------------------------------------------------------------------------------------------------------------------------------------------------------------------------------------------------------------------------------------------------------------------------------------------------------------------------------------------------------------------------------------------------------------------------------------------------------------------------------------------------------------------------------------------------------------------------------------------------------------------------------------------------------------------------------------------------------------------------------------------------------------------------------------------------------------------------------------|
|            | <p>ACCAACTTCACAATTAGCGTGACTACCGAAATACTGCCTGTGAGCATGAC<br/> GAAAACCAGCGTAGACTGCACTATGTATATCTGTGGAGACTCCACTGAGT<br/> GCTCCAACCTTCTCCTGCAGTACGGTAGCTTCTGTACCCAATTGAACCGC<br/> GCCCTTACAGGCATCGCTGTTGAGCAAGATAAGAATACCCAGGAAGTTTT<br/> TGCCCAGGTTAAGCAGATATAACAAAACACCGCCCATTAAGGACTTCGGAG<br/> GCTTCAACTTCTCTCAGATACTGCCTGACCCCTCCAAGCCATCAAAACGC<br/> AGCTTCATTGAGGACCTCTTGTTCACAAAAGTGACTCTGGCTGATGCTGG<br/> CTTCATTAAGCAGTACGGAGATTGCCTGGGAGATATTGCTGCCAGGGACC<br/> TCATCTGCGCCCAGAAGTTAATGGCCTGACAGTCTTGCCCCCACTTCTG<br/> ACAGACGAGATGATTGCTCAGTACACATCTGCCCTCCTCGCTGGCACCAT<br/> AACATCCGGATGGACATTTGGTGCTGGTGCTGCCCTCCAGATTCCCTTCG<br/> CAATGCAGATGGCGTATCGCTTTAACGGCATCGGTGTCACACAAAACGTG<br/> TTGTATGAGAACCAAAAGCTCATCGCTAACCAAGTTAATTCTGCTATTGGT<br/> AAGATTCAGGACAGCCTGTCATCAACCGCGTCTGCCCTGGTAAGTTGCA<br/> GGACGTGGTGAACCAGAATGCTCAGGCTTTGAATACTCTGGTGAAGCAA<br/> CTCTCTTCAAATTCGGCGCTATCTTCTGTGTTGAACGACATCCTGAGT<br/> CGCCTTGATAAGGTGGAAGCTGAAGTTCAAATTGATAGATTGATTACTGG<br/> CAGGCTCCAGTCTTTGCAGACCTACGTTACACAGCAGCTGATTAGGGCGG<br/> CTGAAATTAGAGCTTCCGCCAATCTGGCTGCAACCAAGATGTCCGAATGC<br/> GTCCTGGGTCAAGTCAAAGCGCGTTGACTTTTGTGGTAAAGGCTACCACCT<br/> CATGTCAATTCCCCAGTCAGCACCTCACGGAGTAGTGTTCTCCACGTCA<br/> CCTACGTTCCAGCACAGGAAAAGAATTTTACCACTGCGCCGGCAATCTGT<br/> CACGACGGTAAGGCACACTTCCCCCGCGAGGGCGTATTCGTGTCTAACG<br/> GAACTCATTGGTTCGTACACAGAGAACTTCTATGAGCCTCAGATCATT<br/> ACCACCGACAATACATTTGTGTCCGGTAACTGCGACGTTGTGATTGGAAT<br/> CGTCAACAACACTGTGTACGATCCACTTCAGCCAGAACTGGATAGCTTCA<br/> AGGAAGAATTGGACAAATATTTCAAAAATCACACTTCACCCGATGTGGAC<br/> CTGGGTGACATTAGTGGTATCAATGCGTCCGTGGTCAATATTCAAAAAGA<br/> GATTGACAGGCTCAACGAAGTGGCCAAGAACCTGAACGAAAGTCTTATC<br/> GATCTGCAAGAATTGGGAAAGTATGAGCAGTACATCAAGTGGCCGTGGT<br/> ACATTTGGTTGGGTTTTATCGCCGGTCTGATCGCCATCGTTATGGTTACCA<br/> TTATGCTTTGCTGCATGACGAGCTGTTGCTCCTGTCTGAAGGGATGCTGC<br/> TCTTGCGGATCATGTTGCAAGTTCGATGAAGACGATAGCGAACCAGTTCT<br/> GAAGGGCGTCAAGCTGCATTACACA</p> |
| SARS-CoV S | <p>ATGTTTCATCTTCCTGCTGTTCCCTGACCCTGACCTCCGGCTCCGACCTGGA<br/> CCGCTGCACCACCTTCGACGACGTGCAGGCTCCTAACTACACCCAGCAC<br/> ACCTCCTCCATGCGCGGCGTGTACTACCCTGACGAGATCTTCCGCTCCGA<br/> CACCCTGTACCTGACCCAGGACCTGTTCTGCCCCTTCTACTCCAACGTGA<br/> CCGGCTTCCACACCATCAACCACACCTTCGGCAATCCCGTGATTCCCTTC<br/> AAGGACGGCATCTACTTCGCCGCCACCGAGAAGTCCAACGTGGTGCGCG<br/> GCTGGGTGTTCCGGCTCCACCATGAACAACAAGTCCCAGTCCGTGATCATC<br/> ATCAACAACCTCCACCAACGTGGTGATCCGCGCCTGCAACTTCGAGCTGT<br/> GCGACAATCCCTTCTTCGCCGTGTCCAAGCCCATGGGCACCCAGACCCA</p>                                                                                                                                                                                                                                                                                                                                                                                                                                                                                                                                                                                                                                                                                                                                                                                                                                                                                                                                                                                                                                                                                                                                                                                                                                                                                                                                                                                                                         |

CACCATGATCTTCGACAACGCCTTCAACTGCACCTTCGAGTACATCTCCG  
ACGCCTTCTCCCTGGACGTGTCCGAGAAGTCCGGCAACTTCAAGCACCT  
GCGCGAGTTCGTGTTCAAGAACAAGGACGGCTTCCTGTACGTGTACAAG  
GGCTACCAGCCCATCGACGTGGTGC GCGACCTGCCCTCCGGCTTCAACA  
CCCTGAAGCCCATCTTCAAGCTGCCTCTGGGCATCAACATTACCAACTTC  
CGCGCCATTCTGACCGCCTTCTCTCCCGCCCAGGACATCTGGGGCACCTC  
CGCCGCCGCTACTTCGTGGGCTACCTGAAGCCCACCACCTTCATGCTGA  
AGTACGACGAGAACGGCACCATTACCGACGCCGTGGACTGCTCCCAGAA  
CCCTCTGGCCGAGCTGAAGTGCTCCGTGAAGTCCTTCGAGATTGACAAG  
GGCATTTACCAGACCTCCAACTTCCGCGTGGTGCCCTCCGGCGACGTGGT  
GCGCTTTCCCAACATTACCAACCTGTGTCCCTTCGGCGAGGTGTTCAACG  
CCACCAAGTTTCCCTCCGTGTACGCCTGGGAGCGCAAGAAGATTTCCAA  
CTGCGTGGCCGACTACTCCGTGCTGTACA ACTCCACCTTCTTCTCCACCT  
TCAAGTGCTATGGCGTATCTGCCACCAAGCTGAACGATCTTTGCTTCTCC  
AACGTGTACGCTGACTCCTTCGTGGTGAAAGGTGATGATGTTTCGTGAT  
TGCTCCTGGTCA GACTGGTGTGATTGCTGATTACA ACTACAAGCTGCCTG  
ATGATTTTCATGGGTTGCGTGCTGGCTTGGAACTCGTAACATTGATGCTA  
CCTCCACTGGTAACTACA ACTACAAGTATCGTTACCTGCGTCATGGTAA G  
CTGCGTCCCTTTCGAGCGTGATATTTCCAACGTGCCTTCTCTCCTGATGGC  
AAGCCTTGCACTCCTCCAGCTCTGAACTGCTACTGGCCTCTGAACGATTA  
CGGTTTCTACACCACTACCGGCATTGGCTACCAGCCTTATCGTGTGGTTGT  
GCTGTCTTTCGAGCTGCTGAACGCTCCTGCTACCGTGTGCGGTCTAAGC  
TGTCTACCGATCTGATTAAGAACCAGTGCGTGA ACTTCAACTTCAACGGC  
CTGACCGGCACCGGCGTGCTGACTCCCTCCTCCAAGCGCTTCCAGCCCTT  
CCAGCAGTTCGGCCGCGATGTGTCCGATTTACCGATTCCGTGCGCGATC  
CCAAGACCTCCGAGATTCTGGATATTTCTCCCTGCGCCTTCGGCGGCGTG  
TCCGTGATTACTCCCGGCACCAACGCCTCCTCCGAGGTGGCCGTGCTGTA  
CCAGGATGTGAACTGCACCGATGTGTCCACCGCCATTACGCCGATCAGC  
TGACTCCCGCCTGGCGCATTACTCCACCGGCAACAACGTGTTCCAGACC  
CAGGCCGGCTGCCTGATTGGCGCCGAGCACGTGGATACCTCCTACGAGT  
GCGATATTTCCATTGGCGCCGGCATTTCGCGCTCCTACCACACCGTGTCCC  
TGCTGCGCTCCACCTCCAGAAGTCCATTGTGGCCTACACCATGTCCCTG  
GGCGCCGATTCTCCATTGCCTACTCCAACAACACCATTGCCATTCCCAC  
CAACTTCTCCATTTCCATTACCACCGAGGTGATGCCCGTGTCCATGGCCA  
AGACCTCCGTGGATTGCAACATGTACATTTGCGGCGATTCCACCGAGTGC  
GCCAACCTGCTGCTGCAGTACGGCTCCTTCTGCACCCAGCTGAACCGCG  
CCCTGTCCGGCATTGCCGCCGAGCAGGATCGCAACACCCGCGAGGTGTT  
CGCCCAGGTGAAGCAGATGTACAAGACTCCCACCTGAAGTACTTCGGC  
GGCTTCAACTTCTCCAGATTCTGCCC GATCCTCTGAAGCCCACCAAGCG  
CTCCTTCATTGAGGATCTGCTGTTCAACAAGGTGACCCTGGCCGATGCCG  
GCTTCATGAAGCAGTACGGCGAGTGCCTGGGCGATATTAACGCCCGCGAT  
CTGATTTGCGCGCAGAAGTTCAACGGCCTGACCGTGCTGCCTCCTCTGCT  
GACCGATGATATGATTGCGGCGTACACCGCGGGCGCTGGTGTCCGGCACCG  
CCACCGCGGGCTGGACCTTCGGCGCGGGCGCGGGCGCTGCAGATTCCTT



|                                     |                                                                                                                                                                                                                                                                                                                                                                                                                                                                                                                                                                                                                                                                                                                                                                                                                                                                                                                                                                                                                                                                                                                                                                                                                                                                                                                        |
|-------------------------------------|------------------------------------------------------------------------------------------------------------------------------------------------------------------------------------------------------------------------------------------------------------------------------------------------------------------------------------------------------------------------------------------------------------------------------------------------------------------------------------------------------------------------------------------------------------------------------------------------------------------------------------------------------------------------------------------------------------------------------------------------------------------------------------------------------------------------------------------------------------------------------------------------------------------------------------------------------------------------------------------------------------------------------------------------------------------------------------------------------------------------------------------------------------------------------------------------------------------------------------------------------------------------------------------------------------------------|
|                                     | <p>CGCGATGCAGATGGCGTACCGCTTCAACGGCATTGGCGTGACCCAGAAC<br/> GTGCTGTACGAGAACCAGAAGCAGATTGCGAACCAGTTCAACAAGGCG<br/> ATTTCCCAGATTCAGGAGTCCCTGACCACCACCTCCACCGCGCTGGGCA<br/> AGCTGCAGGATGTGGTGAACCAGAACGCGCAGGCGCTGAACACCCTGG<br/> TGAAGCAGCTGTCCTCCAACCTCGGCGCGATTTCCTCCGTGCTGAACGAT<br/> ATTCTGTCCC GCCTGGATAAGGTGGAGGCGGAGGTGCAGATTGATCGCCT<br/> GATTACCGGCCGCCTGCAGTCCCTGCAGACCTACGTGACCCAGCAGCTG<br/> ATTCGCGCGGGCGGAGATTCGCGCGTCCGCGAACCTGGCGGGCGACCAAGA<br/> TGTCGGAGTGC GTGCTGGGCCAGTCCAAGCGCGTGGATTTCTGCGGCAA<br/> GGGCTACCACCTGATGTCCTTCCCTCAGGCGGGCGCCTCATGGCGTGGTGT<br/> TCCTGCACGTGACCTACGTGCCCTCCCAGGAGCGCAACTTCACCACCGC<br/> GCCCCGCGATTTGCCACGAGGGCAAGGCGTACTTCCCTCGCGAGGGCGTG<br/> TTCGTGTTCAACGGCACCTCCTGGTTCATTACCCAGCGCAACTTCTTCTCT<br/> CCTCAGATTATTACCACCGATAACACCTTCGTGTCCGGCAACTGCGATGT<br/> GGTGATTGGCATTATTAACAACACCGTGTACGATCCTCTGCAGCCCGAGC<br/> TGGATTCCTTCAAGGAGGAGCTGGATAAGTACTTCAAGAACCACACCTCT<br/> CCCGATGTGGATCTGGGCGATATTTCCGGCATTACGCCTCCGTGGTGAA<br/> CATTCAGAAGGAGATTGATCGCCTGAACGAGGTGGCCAAGAACCTGAAC<br/> GAGTCCCTGATTGATCTGCAGGAGCTGGGCAAGTACGAGCAGTACATTAA<br/> GTGGCCTTGGTACGTGTGGCTGGGCTTCATTGCCGGCCTGATTGCCATTG<br/> TGATGGTGACCATTCTGCTGTGCTGCATGACCAGTTGCTGCTCCTGCCTG<br/> AAGGGCGCCTGCTCTTGCGGCTCTTGCTGCAAGTTCGACGAGGACGACT<br/> CCGAGCCCCTGCTGAAGGGCGTGAAGCTGCACTACACC</p> |
| <p>SARS-<br/> CoV-2<br/> S/sRBD</p> | <p>ATGTTTCGTGTTTCTGGTGCTGCTGCCCTGGTGAGCTCCCAGTGCGTGAA<br/> CCTGACCACAAGGACCCAGCTGCCACCTGCCTACACAAATAGCTTCACC<br/> AGGGGCGTGTACTATCTGACAAGGTGTTTCGCTCTAGCGTGCTGCACAG<br/> CACACAGGATCTGTTTCTGCCATTCTTTTCCAACGTGACCTGGTTCCACG<br/> CCATCCACGTGTCCGGCACAAATGGCACCAAGAGGTTTCGACAATCCTGT<br/> GCTGCCCTTCAACGATGGCGTGTACTTCGCCTCCACCGAGAAGTCTAACA<br/> TCATCCGCGGCTGGATCTTTGGCACCACTGGACAGCAAGACACAGTC<br/> CCTGCTGATCGTGAACAATGCCACCAACGTGGTCATCAAGGTGTGCGAG<br/> TTCCAGTTTTGTAATGATCCCTTCCTGGGCGTGTACTATCACAAGAACAAT<br/> AAGTCTTGGATGGAGAGCGAGTTTAGAGTGTACTCCTCTGCCAACAATTG<br/> CACATTTGAGTATGTGAGCCAGCCTTTCCTGATGGACCTGGAGGGCAAGC<br/> AGGGCAATTTCAAGAACCTGCGGGAGTTCGTGTTTAAGAATATCGATGGC<br/> TACTTTAAGATCTATAGCAAGCACACCCCATCAACCTGGTGAGAGACCT<br/> GCCTCAGGGCTTCTCCGCCCTGGAGCCACTGGTGGATCTGCCTATCGGCA<br/> TCAACATCACAAGGTTTCAGACCCTGCTGGCCCTGCACCGCTCCTACCTG<br/> ACACCAGGCGACAGCTCCTCTGGATGGACCGCAGGAGCAGCAGCCTACT<br/> ATGTGGGCTACCTGCAGCCTAGGACCTTCCTGCTGAAGTATAACGAGAAT<br/> GGCACAATCACCGACGCAGTGGATTGCGCCCTGGACCCACTGTCTGAGA<br/> CAAAGTGTACCCTGAAGAGCTTTACAGTGGAGAAGGGCATCTACCAGAC<br/> CTCTAATTTCCGGGTGGTGCCTAGCGGGCGATGTGGTGAGATTTCTAATAT<br/> CACAAACCTGTGCCATTTGGCGAGGTGTTCAACGCCACCAAGTTCCCA</p>                                                                                                        |

AGCGTGACGCCTGGGAGCGCAAGAAGATCTCCAAGTGCCTGGCCGACT  
ACTCTGTGCTGTACAACTCCACATTCTTTTCTACCTTTAAGTGTTACGGCG  
TGAGCGCCACCAAGCTGAATGACCTGTGCTTTAGCAACGTGTATGCCGAT  
TCCTTCGTGGTGAAGGGCGACGATGTGAGGCAGATCGCACCAGGACAGA  
CAGGCGTGATCGCAGACTACAATTATAAGCTGCCTGACGATTCATGGGC  
TGCGTGCTGGCCTGGAATACCCGCAACATCGATGCCACAAGCACCCGGCA  
ACTACAATTATAAGTACAGGTATCTGCGCCACGGCAAGCTGCGGCCTTTT  
GAGAGAGACATCTCCAACGTGCCCTTCTCTCTGATGGCAAGCCATGCAC  
CCCACCCGCCCTGAATTGTTACTGGCCCTGAACGACTACGGCTTCTATA  
CCACAACCCGGCATCGGCTACCAGCCATATAGAGTGGTGGTGTCTTTTT  
GAGCTGCTGAATGCACCAGCAACAGTGTGCGGACCAAGCTGAGCACC  
GATCTGATCAAGAACCAGTGCGTGAACCTCAACTTCAACGGACTGACAG  
GAACCCGGCGTGCTGACCGAGAGCAACAAGAAGTTCCTGCCATTCAGCA  
GTTCCGGCCGGACATCGCCGATAACAACCGACGCCGTGAGAGACCCACAG  
AACTGGAGATCCTGGATATCACCCATGCAGCTTCGGCGGCGTGTCCGT  
GATCACACCAGGAACAAATACCTCCAACCAGGTGGCCGTGCTGTACCAG  
GACGTGAATTGTACCGAGGTGCCTGTGGCCATCCACGCCGATCAGCTGAC  
ACCAACCTGGAGGGTGTATTCTACAGGAAGCAACGTGTTCCAGACCAGG  
GCAGGATGCCTGATCGGAGCAGAGCACGTGAACAATTCTTACGAGTGCG  
ACATCCCAATCGGCGCCGGCATCTGTGCCAGCTATCAGACACAGACCAAC  
TCTCCAAGGAGAGCACGGAGCGTGGCAAGCCAGTCCATCATCGCCTACA  
CCATGTCCCTGGGCGCCGAGAATTCTGTGGCCTATTCCAACAATTCTATCG  
CCATCCCTACAACTTCACCATCTCCGTGACAACCGAGATCCTGCCAGTG  
TCTATGACAAAGACCAGCGTGGACTGCACAATGTACATCTGTGGCGATAG  
CACCGAGTGCTCCAACCTGCTGCTGCAGTATGGCTCTTTTTGTACACAGC  
TGAATAGAGCCCTGACCGGAATCGCAGTGGAGCAGGACAAGAACACAC  
AGGAGGTGTTGCCCAGGTGAAGCAGATCTACAAGACCCCTCCAATCAA  
GGACTTTGGCGGCTTCAACTTCAGCCAGATCCTGCCAGATCCAGCAAG  
CCATCCAAGCGGTCTTTTATCGAGGACCTGCTGTTCAACAAGGTGACCC  
GGCCGATGCCGCTTCATCAAGCAGTACGGCGATTGCCTGGGCGACATCG  
CAGCAAGAGACCTGATCTGTGCCAGAAAGTTAATGGCCTGACAGTGCT  
GCCCCCTCTGCTGACCGATGAGATGATCGCCAGTATAACATCCGCCCTGC  
TGGCCGGCACAATCACCTCTGGATGGACCTTCGGCGCAGGAGCCGCCCT  
GCAGATCCCTTTTGCCATGCAGATGGCCTACAGGTTCAACGGCATCGGCG  
TGACCCAGAATGTGCTGTATGAGAACCAGAAGCTGATCGCCAATCAGTTT  
AACAGCGCCATCGGCAAGATCCAGGACAGCCTGAGCTCCACAGCATCCG  
CCCTGGGCAAGCTGCAGGATGTGGTGAATCAGAACGCCAGGCCCTGAA  
TACCCTGGTGAAGCAGCTGTCTAGCAACTTCGGCGCCATCTCCTCTGTGC  
TGAATGATATCCTGTCCAGGCTGGACAAGGTGGAGGCCGAGGTGCAGAT  
CGACAGGCTGATCACAGGCCGCTGCAGTCCCTGCAGACATACGTGACC  
CAGCAGCTGATCAGGGCAGCAGAGATCAGAGCCTCTGCCAATCTGGCCG  
CCACCAAGATGAGCGAGTGCGTGCTGGGACAGTCCAAGAGGGTGGACT  
TTTGTGGCAAGGGCTACCACCTGATGTCTTTCCCTCAGAGCGCCCCACAC  
GGCGTGGTGTCTTCTGCACGTGACCTATGTGCCCGCCAGGAGAAGAAGT

|                                 |                                                                                                                                                                                                                                                                                                                                                                                                                                                                                                                                                                                                                                                                                                                                                                                                                                                                                                                                                                                                                                                                                                                                                                                                                                                                                                                                                                                                                                                                                                                                                                                                                                                                                                                                                                                                         |
|---------------------------------|---------------------------------------------------------------------------------------------------------------------------------------------------------------------------------------------------------------------------------------------------------------------------------------------------------------------------------------------------------------------------------------------------------------------------------------------------------------------------------------------------------------------------------------------------------------------------------------------------------------------------------------------------------------------------------------------------------------------------------------------------------------------------------------------------------------------------------------------------------------------------------------------------------------------------------------------------------------------------------------------------------------------------------------------------------------------------------------------------------------------------------------------------------------------------------------------------------------------------------------------------------------------------------------------------------------------------------------------------------------------------------------------------------------------------------------------------------------------------------------------------------------------------------------------------------------------------------------------------------------------------------------------------------------------------------------------------------------------------------------------------------------------------------------------------------|
|                                 | <p>TCACAACCGCCCCTGCCATCTGCCACGATGGCAAGGCCCACTTTCCACG<br/> GGAGGGCGTGTTTCGTGAGCAACGGCACACACTGGTTTGTGACCCAGAG<br/> AAATTTCTACGAGCCCCAGATCATCACAACCGACAATACATTCGTGTCCG<br/> GCAACTGTGACGTGGTCATCGGCATCGTGAACAATACCGTGTACGATCCA<br/> CTGCAGCCCGAGCTGGACTCCTTTAAGGAGGAGCTGGATAAGTATTTCAA<br/> GAATCACACCTCTCCCGACGTGGATCTGGGCGACATCTCCGGCATCAATG<br/> CCTCTGTGGTGAACATCCAGAAGGAGATCGACCGCCTGAACGAGGTGGC<br/> CAAGAATCTGAACGAGAGCCTGATCGATCTGCAGGAGCTGGGCAAGTAC<br/> GAGCAGTATATCAAGTGGCCTTGGTACATCTGGCTGGGCTTCATCGCCGG<br/> CCTGATCGCCATCGTGTGATGGTGACAATCATGCTGTGCTGTATGACCAGCT<br/> GCTGTTCCCTGCCTGAAGGGCTGCTGTTCTTGTGGAAGCTGCTGTAAGTTC<br/> GATGAAGACGATAGCGAACCAGTTCTGAAGGGCGTCAAGCTGCATTACA<br/> CA</p>                                                                                                                                                                                                                                                                                                                                                                                                                                                                                                                                                                                                                                                                                                                                                                                                                                                                                                                                                                                                                                                                                                 |
| <p>SARS-<br/>CoV<br/>S/nRBD</p> | <p>ATGTTTCATCTTTCTGCTGTTTCTGACACTGACCAGCGGCTCCGACCTGGA<br/> TAGGTGCACCACATTTGACGATGTGCAGGCCCCCAACTATAACCAGCACA<br/> CAAGCTCCATGCGGGGCGTGTACTATCCTGATGAGATCTTCAGATCCGAC<br/> ACCCTGTATCTGACACAGGACCTGTTTCTGCCCTTTTACTCTAATGTGACC<br/> GGCTTCCACACAATCAATCACACCTTTGGCAACCCTGTGATCCCATTCAA<br/> GGATGGCATCTACTTTGCCGCCACAGAGAAGAGCAACGTGGTGTAGGGGC<br/> TGGGTGTTTCGGCTCCACCATGAACAATAAGTCTCAGAGCGTGATCATCAT<br/> CAACAATTCCACCAACGTGGTCATCCGCGCCTGCAATTTTGTGCTGTGCG<br/> ACAACCCATTCTTTGCCGTGTCTAAGCCCATGGGCACACAGACCCACACA<br/> ATGATCTTTGATAATGCCTTCAACTGTACCTTTGAGTATATCTCCGATGCCT<br/> TTTCTCTGGACGTGTCTGAGAAGAGCGGCAACTTCAAGCACCTGCGGGA<br/> GTTTCGTGTTTAAGAATAAGGACGGCTTCCTGTACGTGTATAAGGGCTACC<br/> AGCCAATCGATGTGGTGAGAGACCTGCCAGCGGCTTCAACACCCTGAA<br/> GCCTATCTTTAAGCTGCCACTGGGCATCAATATCACAAACTTCAGGGCCAT<br/> CCTGACCGCCTTTTCTCCTGCACAGGACATCTGGGGCACCAGCGCCGCA<br/> GCATATTTTCGTGGGCTACCTGAAGCCAACCACCTTCATGCTGAAGTATGAT<br/> GAGAACGGCACCATCACAGACGCCGTGGATTGCAGCCAGAATCCTCTGG<br/> CCGAGCTGAAGTGTTCGTGAAGTCTTTTCGAGATCGACAAGGGCATCTA<br/> CCAGACATCCAACCTTTCCGGGTGCAGCCAACCGAGTCTATCGTGAGATTCC<br/> CTAATATCACAAACCTGTGCCCATTCGGCGAGGTGTTTAAATGCCACCCGC<br/> TTTGCCTCCGTGTACGCCTGGAATCGGAAGAGAATCAGCAACTGCGTGG<br/> CCGACTATTCCGTGCTGTACAACCTCCGCCTTTTCAGCACCTTTAAGTGCT<br/> ATGGCGTGAGCCCCACAAAGCTGAATGACCTGTGCTTCACCAACGTGTA<br/> CGCCGATTCCCTTTGTGATCAGGGGCGACGAGGTGCGCCAGATCGCACCT<br/> GGACAGACAGGCAAGATCGCCGACTACAACCTATAAGCTGCCAGACGATT<br/> TCACCGGCTGCGTGATCGCCTGGAATAGCAACAATCTGGATTCCAAAGTG<br/> GGCGGCAACTACAATTATCTGTACAGGCTGTTCCGCAAGAGCAACCTGA<br/> AGCCATTTGAGCGGGACATCAGCACAGAGATCTACCAGGCAGGATCCAC<br/> CCCATGCAATGGAGTGGAGGGCTTCAACTGTTATTTTCTCTGCAGTCCT<br/> ACGGCTTCCAGCCAACCAATGGCGTGGGCTATCAGCCCTACAGAGTGGT<br/> GGTGTCTCTTTTGTGCTGTGCACGCACCAGCAACAGTGTGCGGACCT</p> |

AAGAAGAGCACCAATCTGGTGAAGAACAAGTGCGTGAACCTTCAACTTCA  
ACGGACTGACCGGAACAGGCGTGCTGACCCCCTCTAGCAAGAGGTTCCA  
GCCTTTTCAGCAGTTCGGCCGCGACGTGTCTGATTTACAGACAGCGTGC  
GGGACCCTAAGACCTCCGAGATCCTGGATATCTCTCCATGCGCCTTTGGC  
GGCGTGAGCGTGATCACCCAGGAACAAACGCCTCCTCTGAGGTGGCCG  
TGCTGTATCAGGATGTGAATTGTACAGACGTGTCCACCGCCATCCACGCC  
GACCAGCTGACACCTGCCTGGAGGATCTACTCTACAGGCAACAACGTGT  
TCCAGACCCAGGCAGGATGCCTGATCGGAGCAGAGCACGTGGATACCTC  
CTATGAGTGCGACATCCCTATCGGGCGCCGGCATCTGTGCCTCCTACCACA  
CAGTGTCTCTGCTGCGCTCCACCTCTCAGAAGTCTATCGTGGCCTATAACC  
ATGAGCCTGGGCGCCGATAGCTCCATCGCCTACAGCAACAATAACAATCGC  
CATCCCAACCAACTTCAGCATCTCCATCACCACAGAAGTGATGCCCGTGA  
GCATGGCCAAGACATCCGTGGACTGCAACATGTATATCTGTGGCGATTCC  
ACCGAGTGCGCCAATCTGCTGCTGCAGTACGGCTCTTTTTGTACACAGCT  
GAACAGAGCCCTGAGCGGAATCGCAGCAGAGCAGGACCGGAATACCAG  
AGAGGTGTTTCGCCAGGTGAAGCAGATGTATAAGACCCCCACACTGAAG  
TACTTTGGCGGCTTCAACTTTAGCCAGATCCTGCCAGATCCCCTGAAGCC  
TACAAAGCGGTCCTTCATCGAGGACCTGCTGTTAATAAGGTGACCCTGG  
CCGATGCCGGCTTCATGAAGCAGTATGGCGAGTGCCTGGGCGATATCAAC  
GCCAGAGACCTGATCTGTGCCCAGAAGTTTAATGGCCTGACAGTGCTGC  
CCCCTCTGCTGACCGACGATATGATCGCCGCCTACACAGCCGCCCTGGTG  
AGCGGCACCGCCACAGCAGGATGGACCTTCGGCGCAGGAGCCGCCCTG  
CAGATCCCCTTCGCCATGCAGATGGCCTATCGGTTTAACGGCATCGGCGT  
GACCCAGAATGTGCTGTACGAGAACCAGAAGCAGATCGCCAATCAGTTT  
AACAAAGGCCATCTCTCAGATCCAGGAGAGCCTGACCACAACCTCCACAG  
CCCTGGGCAAGCTGCAGGACGTGGTGAATCAGAACGCCAGGCCCTGA  
ATACCCTGGTGAAGCAGCTGTCTAGCAACTTCGGCGCCATCTCCTCTGTG  
CTGAATGATATCCTGTCCAGACTGGACAAGGTGGAGGCCGAGGTGCAGA  
TCGATCGGCTGATCACAGGCAGACTGCAGAGCCTGCAGACCTACGTGAC  
ACAGCAGCTGATCAGGGCAGCAGAGATCAGGGCATCCGCCAACCTGGCC  
GCCACCAAGATGTCCGAGTGCCTGCTGGGCCAGTCTAAGAGGGTGGACT  
TCTGTGGCAAGGGCTATCACCTGATGTCTTTCCACAGGCAGCACACAC  
GGAGTGGTGTTCCTGCACGTGACCTACGTGCCAGCCAGGAGCGCAACT  
TTACAACCGCACCTGCAATCTGCCACGAGGGCAAGGCCTACTTCCAAG  
GGAGGGCGTGTTTCGTGTTAACGGCACATCCTGGTTTATCACCAGCGCA  
ATTTCTTTTCTCCCCAGATCATCACAACCGACAATACATTCGTGAGCGGCA  
ACTGTGACGTGGTCATCGGCATCATCAACAATACCGTGTATGATCCCCTGC  
AGCCTGAGCTGGACTCTTTCAAGGAGGAGCTGGATAAGTACTTTAAGAA  
CCACACCAGCCCAGACGTGGATCTGGGCGACATCTCTGGCATCAATGCC  
AGCGTGGTGAACATCCAGAAGGAGATCGACCGGCTGAATGAGGTGGCCA  
AGAATCTGAACGAGAGCCTGATCGATCTGCAGGAGCTGGGCAAGTATGA  
GCAGTACATCAAGTGGCCCTGGTACGTGTGGCTGGGCTTCATCGCCGGCC  
TGATCGCCATCGTGATGGTGACAATCCTGCTGTGCTGTATGACCAGCTGC  
TGTTCTGCTGCTGAAGGGCGCCTGCTCTTGTGGAAGCTGCTGTAAGTTCGA

|            |                                                                                                                                                                                                                                                                                                                                                                                                                                                                                                                                                                                                                                                                                                                                                                                                                                                                                                                                                                                                                                                                                                                                                                                                                                                                                                                                                                                                                                                                                                                                                                                                                                                                                                                                                                                                                                                                                                                                                                                                                                                                                                                                                                                                                                                                                                                                                                                                       |
|------------|-------------------------------------------------------------------------------------------------------------------------------------------------------------------------------------------------------------------------------------------------------------------------------------------------------------------------------------------------------------------------------------------------------------------------------------------------------------------------------------------------------------------------------------------------------------------------------------------------------------------------------------------------------------------------------------------------------------------------------------------------------------------------------------------------------------------------------------------------------------------------------------------------------------------------------------------------------------------------------------------------------------------------------------------------------------------------------------------------------------------------------------------------------------------------------------------------------------------------------------------------------------------------------------------------------------------------------------------------------------------------------------------------------------------------------------------------------------------------------------------------------------------------------------------------------------------------------------------------------------------------------------------------------------------------------------------------------------------------------------------------------------------------------------------------------------------------------------------------------------------------------------------------------------------------------------------------------------------------------------------------------------------------------------------------------------------------------------------------------------------------------------------------------------------------------------------------------------------------------------------------------------------------------------------------------------------------------------------------------------------------------------------------------|
|            | CGAGGACGACTCCGAGCCCGTGCTGAAGGGCGTGAAGCTGCACTACACC                                                                                                                                                                                                                                                                                                                                                                                                                                                                                                                                                                                                                                                                                                                                                                                                                                                                                                                                                                                                                                                                                                                                                                                                                                                                                                                                                                                                                                                                                                                                                                                                                                                                                                                                                                                                                                                                                                                                                                                                                                                                                                                                                                                                                                                                                                                                                     |
| MERS-CoV S | ATGATTCACTCCGTGTTCTCCTGATGTTCTGCTCACTCCTACCGAAAGT<br>TATGTGGATGTGGGTCCCGATAGCGTCAAGTCCGCATGCATCGAGGTGGA<br>TATTCAGCAGACATTCTTTGACAAGACCTGGCCTCGGCCAATCGATGTCT<br>CCAAAGCCGACGGCATCATTTACCCTCAGGGACGCACCTATAGCAACATC<br>ACTATTACATACCAGGGCCTGTTCCCATATCAGGGCGACCACGGAGATATG<br>TACGTGTATTCTGCCGGACATGCTACTGGCACCCTCCTCAGAACTGTT<br>CGTGGCAAATACTCCCAGGACGTCAAGCAGTTCGCCAACGGTTTTGTG<br>GTCAGGATCGGCGCCGCTGCAAACCTTACC GGCACTGTGATCATTAGCCC<br>TTCTACTTCAGCCACAATCAGAAAAATTTACCCAGCTTTTATGCTGGGCTC<br>CAGCGTGGGAACTTCTCCGATGGCAAGATGGGCCGTTTCTTTAATCACA<br>CTCTGGTCCTGCTCCCTGACGGATGCGGTACTGCTCCGCGCTTTCTAC<br>TGTATCCTGGAGCCCAGGAGCGGAAATCACTGCCCTGCCGGTAACTCTTA<br>CACCTCATTCGCCACCTATCATACTCCAGCTACAGACTGTTCTGATGGCAA<br>TTATAACAGAAATGCCAGTCTGAACTCCTTCAAGGAATACTTTAATCTCCG<br>TAACTGCACATTCATGTACACCTATAATCACTGAGGACGAAATCTGGA<br>GTGGTTTCGGTATCACACAGACCGCTCAGGGCGTGCACCTGTTTTCTTAC<br>GCTACGTCGATCTCTATGGCGGAAACATGTTCCAGTTTGCCACTCTGCC<br>GTGTACGACACAATCAAGTACTATTCCATCATTCTCATAGCATCCGGTCT<br>ATTCAGTCAGACCGCAAGGCTTGGGCCGCTTTCTACGTGTATAAACTGCA<br>GCCTCTCACCTTCTGCTCGATTTTTCCGTGGACGGATACATCCGCAGGG<br>CCATTGATTGCGGTTTCAACGACCTGAGCCAGCTCCACTGTAGTTATGAA<br>TCCTTCGATGTGGAGAGTGGTGTGTACTCCGTCAGTTCCTTTGAGGCTAA<br>GCCCAGTGGTTCGTTGGTTCGAGCAGGCAGAAGGCGTGGAGTGCAGCTTC<br>AGCCCTCTGCTCTCTGGCACACCCCCTCAGGTGTATAACTTCAAAGGCT<br>GGTCTTTACCAACTGTAATTACAACCTGACTAAGCTGCTCAGCCTCTTCTC<br>TGTGAACGACTTTACCTGCTCACAGATCAGTCCCGCAGCCATTGCTTCAA<br>ATTGTTACAGCTCTCTGATCCTCGATTACTTCAGTTATCCTCTGTCCATGAA<br>AAGCGACCTCTCTGTGTCAAGTGCTGGCCCAATCTCCAGTTTAATTACA<br>AGCAGAGCTTCTCTAACCCTACCTGCCTGATTCTCGCCACTGTGCCACAC<br>AACCTGACAACCATCACAAAGCCCCCTCAAGTACAGCTACATCAACAAGT<br>GCTCAAGGCTGCTCAGTGACGATAGAACCGAAGTGCCACAGCTGGTCAA<br>TGCCAACCAGTACTCCCCATGTGTGAGCATCGTCCCCTTACCCTGTGGG<br>AAGACGGAGATTACTATAGGAAGCAGCTGTCCCCCTGGAGGGTGGAGG<br>ATGGCTGGTGGCATCAGGTAGTACAGTCGCCATGACCGAGCAGCTCCAG<br>ATGGGCTTCGGAATCACTGTGCAGTACGGCACTGATACAAATTCCGTCTG<br>CCCAAAGCTGGAATTTGCTAACGACACAAAAATCGCAAGCCAGCTGGGC<br>AATTGCGTGGAGTACTCCCTCTATGGAGTGAGCGGTTCGTGGCGTCTTCCA<br>GAACTGTA CTGCAGTGGGAGTCAGGCAGCAGAGGTTTGTGTACGATGCT<br>TATCAGAACCTGGTCCGCTACTATAGCGACGATGGAAATTA CTATTGCCTC<br>CGCGCTTGTGTGTCAGTCCCCGTGAGTGT CATCTACGACAAGGAAACCA<br>AAACTCACGCAACCCTGTTCCGGCTCTGTGGCCTGCGAGCATATTTCCAGC<br>ACTATGTCACAGTACTCCAGGAGCACAAGAAGTATGCTGAAGAGACGTG<br>ACTCCACATACGGACCCCTCCAGACCCCTGTGGGTTGCGTCCTGGGCCTC |

|       |                                                                                                                                                                                                                                                                                                                                                                                                                                                                                                                                                                                                                                                                                                                                                                                                                                                                                                                                                                                                                                                                                                                                                                                                                                                                                                                                                                                                                                                                                                                                                                                                                                                                                                                                                                                                                                                                                                                                                                                                                                                                                                                                                                                                                          |
|-------|--------------------------------------------------------------------------------------------------------------------------------------------------------------------------------------------------------------------------------------------------------------------------------------------------------------------------------------------------------------------------------------------------------------------------------------------------------------------------------------------------------------------------------------------------------------------------------------------------------------------------------------------------------------------------------------------------------------------------------------------------------------------------------------------------------------------------------------------------------------------------------------------------------------------------------------------------------------------------------------------------------------------------------------------------------------------------------------------------------------------------------------------------------------------------------------------------------------------------------------------------------------------------------------------------------------------------------------------------------------------------------------------------------------------------------------------------------------------------------------------------------------------------------------------------------------------------------------------------------------------------------------------------------------------------------------------------------------------------------------------------------------------------------------------------------------------------------------------------------------------------------------------------------------------------------------------------------------------------------------------------------------------------------------------------------------------------------------------------------------------------------------------------------------------------------------------------------------------------|
|       | <p>GTGAACTCTTCACTGTTTCGTGCGAAGATTGCAAGCTGCCTCTCGGACAGTC<br/> CCTGTGTGCCCTCCCAGACACCCCCAGCACACTGACCCACGTTTCAGTG<br/> CGGAGTGTCCCGGCGAGATGCGTCTGGCATCTATCGCCTTCAATCACCC<br/> AATTCAGGTGGATCAGCTGAACAGTTCCTACTTTAAGCTCTCTATCCCCAC<br/> AAACTTCTCATTGGCGTGACCCAGGAGTACATCCAGACTACAATTCAGA<br/> AGGTGACCGTGGACTGCAAACAGTACGTGTGTAACGGATTCCAGAAATG<br/> CGAACAGCTGCTCCGCGAGTACGGCCAGTTTTGTAGCAAGATCAATCAG<br/> GCACTGCATGGCGCCAACCTCCGTCAGGACGATAGCGTGCGGAACCTGT<br/> TCGCTTCTGTCAAGAGCTCTCAGTCAAGTCCTATCATTCCAGGTTTCGGT<br/> GGCGACTTTAACCTGACCCTGCTCGAACCAGTGTCTATCTCAACTGGCAG<br/> TCGCTCCGCTAGGAGCGCAATCGAGGATCTGCTCTTCGACAAGGTGACC<br/> ATTGCCGACCCCGGATACATGCAGGGTTATGACGATTGCATGCAGCAGGG<br/> ACCTGCCTCTGCTAGGGATCTGATCTGTGCTCAGTACGTGGCAGGTTATA<br/> AGGTCTGCCACCCCTCATGGACGTGAACATGGAAGCTGCATACACCTCC<br/> AGCCTGCTCGGTTCCATCGCCGGAGTCGGTTGGACTGCTGGCCTGTCTTC<br/> ATTCGCCGCTATCCCCTTGTCTCAGTCTATTTTCTACAGACTGAACGGCGT<br/> GGGAATCACCCAGCAGGTCCTGTGAGAGAATCAGAAGCTCATTGCCAAT<br/> AAATTCAACCAGGCCCTGGGAGCTATGCAGACTGGTTTTACCACTACAAA<br/> CGAGGCCTTCCAGAAAGTGCAGGACGCAGTCAACAATAACGCACAGGC<br/> CCTGAGCAAGCTCGCTTCCGAGCTGAGCAACACCTTCGGAGCAATCAGC<br/> GCCTCTATTGGTGATATCATTAGAGGCTGGACGTGCTCGAACAGGATGC<br/> CCAGATCGACAGACTGATTAATGGCCGTCTGACCACTCTCAACGCTTTCG<br/> TGGCACAGCAGCTGGTCCGGTCAGAAAGTGCAGCCCTGTCCGCCAGCT<br/> CGCTAAGGACAAAGTGAACGAGTGCCTCAAGGCTCAGTCTAAAAGATCA<br/> GGATTTTGTGGTCAGGGCACCCACATCGTGAGCTTCGTGGTCAATGCCCC<br/> AAACGGCCTGACTTTATGCACGTCGGATACTATCCCTCAAACCATATCGA<br/> GGTCGTGAGTGTACGGCCTGTGCGATGCTGCAAATCCTACAAACTGTA<br/> TTGCCCCAGTGAACGGATACTTCATCAAGACCAACAACACTAGAATTGTG<br/> GACGAATGGTCTTACACCGGCAGTTCCTTCTATGCACCCGAGCCTATCAC<br/> TTCCTGAAACACAAAGTACGTGGCCCCCAGGTCCTTATCAGAATATCA<br/> GTACAAACCTGCCTCCACCACTGCTCGGCAACTCCACCGGAATTGACTTC<br/> CAGGATGAACTGGACGAGTTCTTTAAGAATGTGTCCACAAGCATCCCTAA<br/> CTTTGGAAGCCTGACCCAGATTAACACAACCCCTGCTCGATCTCACTTACG<br/> AGATGCTGAGCCTCCAGCAGGTGGTCAAGGCTCTGAATGAATCTTACATC<br/> GACCTGAAAGAGCTCGGTAATTATACATACTATAACAAGTGGCCCTGGTA<br/> CATCTGGCTGGGTTTCATTGCAGGACTCGTGGCTCTGGCACTCTGCGTCT<br/> TCTTTATCCTGTGCTGTACCGGATGCGGTAATAATTGTATGGGCAAGCTGA<br/> AATGTAACCGCTGTTGCGACCGGTACGAGGAGTACGACCTGGAGCCCCA<br/> CAAGGTGCACGTGCAC</p> |
| MHV S | <p>ATGCTGTTTCGTGTTTCATCCTGTTCCCTGCCAGCTGCCTGGGCTACATCGGC<br/> GACTTCCGGTGCATCCAGCTGGTGAACAGCAACGGAGCAAACGTGAGC<br/> GCACCAAGCATCAGCACCGAGACCGTGGAGGTGAGCCAGGGACTGGGC<br/> ACCTACTACGTGCTGGACAGAGTGTACCTGAACGCCACCCTGCTGCTGA<br/> CCGGCTACTACCCCGTGGACGGCAGCAAGTTCAGGAACCTGGCCCTGAC</p>                                                                                                                                                                                                                                                                                                                                                                                                                                                                                                                                                                                                                                                                                                                                                                                                                                                                                                                                                                                                                                                                                                                                                                                                                                                                                                                                                                                                                                                                                                                                                                                                                                                                                                                                                                                                                                                                                                                                   |

CGGCACCAACAGCGTGAGCCTGAGCTGGTTCCAGCCCCCTACCTGAGC  
CAGTTCAACGACGGCATCTTCGCCAAGGTGCAGAACCTGAAGACCAGCA  
CCCCAGCGGGCCACCAGCTACTTCCCCACCATCGTGATCGGCAGCCTG  
TTCGGCTACACCAGCTACACCGTGGTCATCGAGCCCTACAACGGCGTGAT  
CATGGCCAGCGTGTGCCAGTACACCATCTGCCAGCTGCCCTACACCGACT  
GCAAGCCCAACACCAACGGCAACAAGCTGATCGGCTTCTGGCACACCGA  
CGTGAAGCCCCCATCTGCGTGCTGAAGCGCAACTTCACCCTGAACGTG  
AACGCCGACGCCTTCTACTTCCACTTCTACCAGCACGGCGGCACCTTCTA  
CGCCTACTACGCCGACAAGCCCAGCGCCACCACCTTCCTGTTACAGCGTGT  
ACATCGGCGACATCCTGACCCAGTACTACGTGCTGCCCTTCATCTGCAAC  
CCAACCGCAGGCAGCACCTTCGCACCAAGGTACTGGGTGACCCACTGG  
TGAAGAGACAGTACCTGTTCAACTTCAACCAGAAGGGCGTGATCACCAG  
CGCCGTGGACTGCGCCAGCAGCTACACCAGCGAGATCAAGTGCAAGACC  
CAGAGCATGCTGCCCAGCACCGGAGTGTACGAGCTGAGCGGATACACCG  
TGCAGCCAGTGGGAGTGGTGTACAGGAGGGTGGCAAACCTGCCAGCATG  
CAACATCGAGGAGTGGCTGACCGCACGGAGCGTGCCAGCCCCCTGAAC  
TGGGAGAGAAAGACCTTCCAGAACTGCAACTTCAACCTGAGCAGCCTGC  
TGAGATACGTGCAGGCCGAGAGCCTGTTCTGCAACAACATCGACGCCAG  
CAAGGTGTACGGCCGCTGCTTCGGCAGCATCAGCGTGGACAAGTTCGCC  
GTGCCCCGGAGCAGACAGGTGGACCTGCAGCTGGGCAAACAGCGGCTTC  
CTGCAGACCGCCAACTACAAGATCGACACCGCCGCCACCAGCTGCCAGC  
TGCACTACACCCTGCCCAAGAACAACGTGACCATCAACAATCACAACCC  
CAGCAGCTGGAACAGGCGCTACGGCTTCAACGACGCCGGCGTGTTCCGGC  
AAGAACCAGCACGACGTGGTGTACGCCCAGCAGTGCTTCACCGTGCGGA  
GCAGCTACTGCCCATGCGCACAGCCAGACATCGTGAGCCCATGCACCAC  
CCAGACCAAGCCAAAGAGCGCCTTCGTGAACGTGGGCGACCACTGCGA  
GGGACTGGGAGTGCTGGAGGACAACCTGCGGAAACGCCGACCCCCACAA  
GGGATGCATCTGCGCCAACAACAGCTTCATCGGCTGGAGCCACGACACC  
TGCCTGGTGAACGACAGATGCCAAATCTTCGCCAACATCCTGCTGAACG  
GCATCAACAGCGGCACCACCTGCAGCACCGACCTGCAGCTGCCAACAC  
CGAGGTGGTGACCGGCATCTGCGTGAAGTACGACCTGTACGGCATCACC  
GGCCAGGGCGTGTTCAAGGAGGTGAAGGCCGACTACTACAACAGCTGG  
CAGACCCTGCTGTACGACGTGAACGGCAACCTGAACGGCTTCAGGGACC  
TGACCACCAACAAGACCTACACCATCCGCAGCTGCTACAGCGGCCGGGT  
GAGCGCAGCATTCCACAAGGACGCACCAGAGCCAGCCCTGCTGTACAGA  
AACATCAACTGCAGCTACGTGTTTCAGCAACAACATCAGCAGGGAGGAGA  
ACCCCTGAACTACTTCGACAGCTACCTGGGATGCGTGGTGAACGCAGA  
CAACAGGACCGACGAGGCCCTGCCAAACTGCGACCTGAGGATGGGAGC  
AGGACTGTGCGTGGACTACAGCAAGAGCAGAAGGGCCCACCGCAGCGT  
GAGCACCGGCTACAGACTGACCACCTTCGAGCCCTACACCCCATGCTG  
GTGAACGACAGCGTGCAGAGCGTGGACGGCCTGTACGAGATGCAGATCC  
CCACCAACTTCACCATCGGCCACCACGAGGAGTTCATCCAGACCCGGAG  
CCCCAAGGTGACCATCGACTGCGCCGCCTTCGTGTGCGGCGACAACACC  
GCCTGCAGACAGCAGCTGGTGGAGTACGGCAGCTTCTGCGTGAACGTGA

ACGCCATCCTGAACGAGGTGAACAACCTGCTGGACAACATGCAGCTGCA  
GGTGGCCAGCGCACTGATGCAGGGAGTGACCATCAGCAGCAGGCTGCCA  
GACGGAATCAGCGGCCCCATCGACGACATCAACTTCAGCCCCCTGCTGG  
GATGCATCGGCAGCACCTGCGCAGAGGACGGAAACGGACCAAGCGCAA  
TCCGCGGCCGGAGCGCCATCGAGGACCTGCTGTTTCGACAAGGTGAAGCT  
GAGCGACGTGGGCTTCGTGGAGGCCTACAACAACCTGCACCCGGCGGCCA  
GGAGGTGAGAGACCTGCTGTGCGTGCAGAGCTTCAACGGCATCAAGGTG  
CTGCCACCAGTGCTGAGCGAGAGCCAGATCAGCGGATACACCACCGGAG  
CAACCGCTGCCGCAATGTTCCCACCCTGGAGCGCTGCCGCAGGCGTGCC  
CTTCAGCCTGAGCGTGCAGTACAGGATCAACGGCCTGGGCGTGACCATG  
AACGTGCTGAGCGAGAACCAGAAGATGATCGCCAGCGCCTTCAACAACG  
CCCTGGGCGCCATCCAGGACGGCTTCGACGCCACCAACAGCGCCCTGGG  
CAAGATCCAGAGCGTGGTGAACGCCAACGCCGAGGCCCTGAACAACCT  
GCTGAACCAGCTGAGCAACAGGTTCGGAGCAATCAGCGCCAGCCTGCA  
GGAGATCCTGACCCGGCTGGAGGCAGTGGAGGCAAAGGCACAGATCGA  
CAGACTGATCAACGGCAGGCTGACCGCCCTGAACGCCTACATCAGCAAG  
CAGCTGAGCGACAGCACCCCTGATCAAGGTGAGCGCCGCCAGGCCATCG  
AGAAGGTGAACGAGTGCCTGAAGAGCCAGACCACCCGCATCAACTTCT  
GCGGCAACGGCAACCACATCCTGAGCCTGGTGCAGAACGCCCCCTACGG  
CCTGTACTTCATCCAATTACAGCTACGTGCCAATCAGCTTACCACCGCAA  
ACGTGAGCCCAGGACTGTGCATCAGCGGCGACAGGGGCCTGGCCCCAA  
AGGCAGGCTACTTCGTGCAGGACGACGGCGAGTGGAAGTTCACCGGCA  
GCAGCTACTACTACCCCGAGCCATCACCGACAAGAACAGCGTGATCATG  
AGCAGCTGCGCCGTGAACCTACCAAGGCCCCCGAGGTGTTCCCTGAACA  
CCAGCATCCCCAACCCCTCCCGACTTCAAGGAGGAGCTGGACAAGTGGTT  
CAAGAACCAGACCAGCATCGCCCCGACCTGAGCCTGGACTTCGAGAAG  
CTGAACGTGACCCTGCTGGACCTGACCTACGAGATGAACAGAATCCAGG  
ACGCCATCAAGAAGCTGAACGAGAGCTACATCAACCTGAAGGAAGTGG  
GCACCTACGAGATGTACGTGAAGTGGCCCTGGTACGTGTGGCTGCTGATC  
GGCCTGGCCGGAGTGGCAGTGTGCGTGCTGCTGTTCTTCATCTGCTGCTG  
CACCGGCTGCGGCAGCTGCTGCTTCAAGAAGTGCGGCAACTGCTGCGAC  
GAGTACGGCGGCCACCAGGACAGCATCGTGATCCACAACATCAGCAGCC  
ACGAGGAC
